# Supplementary material for: Social Networking Sites, Depression, and Anxiety: A Systematic Review
Source: PubMed Central journal article supplement (PMC5143470; doi:10.2196/mental.5842), 2016-11-23
Supplement: mental_v3i4e50_app1.pdf [file mental_v3i4e50_app1.pdf]

| <b>Study</b>              | <b>Population</b> | <b>SNS</b>       | <b>Sample Size</b> | <b>Bias Rating</b> | <b>Well-being</b> | <b>Mediators/moderators</b> |
|---------------------------|-------------------|------------------|--------------------|--------------------|-------------------|-----------------------------|
| Andreassen et al. [117]   | General           | General          | 23533              | 1                  |                   |                             |
| Appel et al. [116]        | General           | Facebook         | 89                 | 1                  | ✓                 |                             |
| Baker & Jeske [80]        | General           | Facebook         | 184                | 0                  | ✓                 |                             |
| Baker & Moore [100]       | General           | MySpace          | 134                | 1                  |                   |                             |
| Baker & Moore [101]       | General           | MySpace          | 58                 | 1                  |                   |                             |
| Banjanin et al. [53]      | Adolescents       | Facebook         | 336                | 0                  |                   |                             |
| Blachnio et al. [118]     | General           | Facebook         | 672                | 1                  |                   |                             |
| Bodroža & Jovanović [106] | General           | Facebook         | 804                | 0                  |                   |                             |
| Burke & Ruppel [105]      | Young adults      | Facebook         | 152                | 1                  |                   | ✓                           |
| Casale & Fioravanti [104] | Young adults      | Facebook         | 400                | 1                  |                   | ✓                           |
| Davidson & Farquhar [86]  | Young adults      | Facebook         | 336                | 1                  |                   |                             |
| Davila et al. [54]        | Young adults      | Facebook/MySpace | 718                | 0                  |                   | ✓                           |
| De Choudhury et al. [91]  | General           | Twitter          | 489                | 1                  |                   |                             |
| De Choudhury et al. [92]  | Other             | Facebook         | 165                | 0                  |                   |                             |
| große Deters & Mehl [102] | Young adults      | Facebook         | 86                 | 0                  | ✓                 | ✓                           |
| große Deters et al. [98]  | Young adults      | Facebook         | 362                | 1                  |                   | ✓                           |
| Dumitrache et al. [97]    | Adolescents       | Facebook         | 123                | 2                  |                   |                             |
| Farahani et al. [55]      | Young adults      | Facebook         | 265                | 1                  |                   |                             |
| Feinstein et al. [115]    | Young adults      | Facebook         | 268                | 1                  |                   | ✓                           |
| Feinstein et al. [56]     | Young adults      | Facebook/MySpace | 301                | 0                  |                   |                             |
| Fernandez et al. [57]     | Young adults      | Facebook         | 62                 | 0                  |                   |                             |
| Frison & Eggermont [110]  | Adolescents       | Facebook         | 910                | 1                  | ✓                 | ✓                           |
| Frison et al. [81]        | Adolescents       | Facebook         | 1621               | 0                  | ✓                 | ✓                           |
| Ghosh & Dasgupta [99]     | General           | Facebook         | 120                | 2                  | ✓                 |                             |
| Giota & Kleftras [58]     | Young adults      | Facebook         | 143                | 1                  |                   |                             |
| Green et al. [59]         | General           | Facebook         | 306                | 0                  |                   |                             |
| Grieve et al. [113]       | Young adults      | Facebook         | 618                | 1                  | ✓                 |                             |
| Hanprathet et al. [119]   | Adolescents       | Facebook         | 832                | 1                  |                   |                             |
| Homan et al. [89]         | Young adults      | Trevorspace      | 195                | 1                  |                   |                             |
| Hong et al. [109]         | Young adults      | Facebook         | 230                | 0                  |                   | ✓                           |

| <b>Study</b>            | <b>Population</b>     | <b>SNS</b> | <b>Sample Size</b> | <b>Bias Rating</b> | <b>Well-being</b> | <b>Mediators/moderators</b> |
|-------------------------|-----------------------|------------|--------------------|--------------------|-------------------|-----------------------------|
| Hong et al. [60]        | Young adults          | Facebook   | 241                | 1                  | ✓                 | ✓                           |
| Indian & Grieve [111]   | General               | Facebook   | 299                | 0                  | ✓                 | ✓                           |
| Jelenchick et al. [61]  | Young adults          | Facebook   | 190                | 0                  |                   |                             |
| Koc & Gulyagci [62]     | Young adults          | Facebook   | 447                | 0                  |                   |                             |
| Kross et al. [63]       | General               | Facebook   | 82                 | 0                  | ✓                 | ✓                           |
| Labrague [64]           | Young adults          | Facebook   | 76                 | 0                  |                   |                             |
| Landoll et al. [107]    | Young adults          | General    | 430                | 1                  |                   |                             |
| Lee [114]               | Young adults          | Facebook   | 191                | 2                  | ✓                 |                             |
| Lee-Won et al. [65]     | Young adults          | Facebook   | 243                | 0                  |                   | ✓                           |
| Lin et al. [66]         | Adults                | General    | 1787               | 0                  |                   |                             |
| Locatelli et al. [67]   | Young adults          | Facebook   | 251                | 0                  | ✓                 | ✓                           |
| Lup et al. [68]         | Young adults          | Instagram  | 117                | 0                  |                   | ✓                           |
| McCloskey et al. [112]  | Young adults          | Facebook   | 633                | 1                  | ✓                 |                             |
| McCord et al. [69]      | Young adults          | Facebook   | 216                | 0                  |                   |                             |
| Moberg & Anestis [108]  | Young adults          | General    | 305                | 0                  |                   |                             |
| Mok et al. [70]         | General               | General    | 59                 | 2                  |                   |                             |
| Moreau et al. [120]     | Adolescents           | Facebook   | 456                | 1                  |                   |                             |
| Moreno et al. [85]      | Young adults          | Facebook   | 200                | 2                  |                   |                             |
| Moreno et al. [94]      | Young adults          | Facebook   | 307                | 1                  |                   |                             |
| Morin-Major et al. [71] | Adolescents           | Facebook   | 88                 | 0                  | ✓                 |                             |
| Mota-Pereira [88]       | Clinical (depression) | Facebook   | 60                 | 2                  |                   |                             |
| Pantic et al. [72]      | Adolescents           | General    | 160                | 1                  |                   |                             |
| Park et al. [83]        | Young adults          | Facebook   | 55                 | 2                  |                   |                             |
| Park et al. [84]        | General               | Facebook   | 212                | 0                  |                   |                             |
| Park et al. [93]        | Young adults          | Facebook   | 103                | 0                  |                   |                             |
| Rae & Lonborg [73]      | Young adults          | Facebook   | 119                | 0                  | ✓                 | ✓                           |
| Raunch et al. [122]     | Young adults          | Facebook   | 26                 | 1                  |                   |                             |
| Rosen et al. [74]       | General               | Facebook   | 1143               | 1                  |                   |                             |
| Settani & Marengo [95]  | Adults                | Facebook   | 201                | 0                  |                   |                             |
| Shaw et al. [75]        | Young adults          | Facebook   | 75                 | 0                  |                   | ✓                           |

| <b>Study</b>             | <b>Population</b> | <b>SNS</b>                        | <b>Sample Size</b> | <b>Bias Rating</b> | <b>Well-being</b> | <b>Mediators/moderators</b> |
|--------------------------|-------------------|-----------------------------------|--------------------|--------------------|-------------------|-----------------------------|
| Simoncic et al. [76]     | Young adults      | Facebook                          | 237                | 0                  |                   | ✓                           |
| Steers et al. [77]       | Young adults      | Facebook                          | 332                | 0                  |                   | ✓                           |
| Szwedo et al. [103]      | Young adults      | Facebook/MySpace                  | 138                | 1                  |                   |                             |
| Takahashi et al. [90]    | General           | Depression specific SNS (unnamed) | 105                | 1                  |                   |                             |
| Tandoc et al. [78]       | Young adults      | Facebook                          | 736                | 0                  |                   | ✓                           |
| Tsai et al. [87]         | General           | Facebook                          | 202                | 0                  |                   |                             |
| Tsugawa et al. [96]      | General           | Twitter                           | 209                | 0                  |                   |                             |
| Wegmann et al. [121]     | Young adults      | General                           | 334                | 1                  |                   | ✓                           |
| Weidmann & Levinson [82] | Young adults      | Facebook                          | 77                 | 0                  |                   | ✓                           |
| Wright et al. [79]       | Young adults      | Facebook                          | 361                | 0                  |                   |                             |

*Note.* SNS = social network site. Check indicates that well-being or mediators/ moderators were included. See main article for references.
