# Supplementary material for: Social Networking Sites, Depression, and Anxiety: A Systematic Review
Source: PubMed Central journal article supplement (PMC5143470; doi:10.2196/mental.5842), 2016-11-23
Supplement: mental_v3i4e50_app2.pdf [file mental_v3i4e50_app2.pdf]

|                             | <b>Study</b>           | <b>Mental Health Focus</b> | <b>Key SNS Variables</b>                | <b>Direct Associations</b> | <b>Additional Notes and Complex Relationships</b>                                                                                                            |
|-----------------------------|------------------------|----------------------------|-----------------------------------------|----------------------------|--------------------------------------------------------------------------------------------------------------------------------------------------------------|
| <b>Frequency of SNS use</b> | Banjanin et al. [53]   | Depression                 | Average time on SNS (timeframe unclear) | NS                         |                                                                                                                                                              |
|                             | Davila et al. [54]     | Depression                 | Daily average time on SNS               | NS                         |                                                                                                                                                              |
|                             | Farahani et al. [55]   | Depression                 | Daily average time on SNS               | NS                         |                                                                                                                                                              |
|                             | Feinstein et al. [56]  | Depression                 | Daily average time on SNS               | NS                         |                                                                                                                                                              |
|                             | Frison et al. [81]     | Depression                 | Daily average time on SNS               | +                          |                                                                                                                                                              |
|                             | Giota & Kleftaras [58] | Depression                 | Daily average time on SNS               | NS                         |                                                                                                                                                              |
|                             | Jelenchick et al. [61] | Depression                 | Daily average time on SNS               | NS                         |                                                                                                                                                              |
|                             | Labrague [64]          | Depression                 | Daily average time on SNS               | +                          |                                                                                                                                                              |
|                             | Lin et al. [66]        | Depression                 | Daily average time on SNS               | +                          |                                                                                                                                                              |
|                             | Locatelli et al. [67]  | Depression                 | Daily average time on SNS               | NS                         |                                                                                                                                                              |
|                             | Lup et al. [68]        | Depression                 | Daily average time on SNS               | +                          | Moderated by the proportion of strangers in a network and was only significant at the highest level. It became NS at the lower levels of strangers followed. |

| <b>Study</b>         | <b>Mental Health Focus</b> | <b>Key SNS Variables</b>                          | <b>Direct Associations</b>                  | <b>Additional Notes and Complex Relationships</b>                                                                        |
|----------------------|----------------------------|---------------------------------------------------|---------------------------------------------|--------------------------------------------------------------------------------------------------------------------------|
| Pantic et al. [72]   | Depression                 | Daily average time on SNS                         | +                                           |                                                                                                                          |
| Rae & Lonborg [73]   | Depression                 | Daily average time on SNS                         | NS                                          | Significant interaction-relationship is positive for those higher in motivations to use Facebook for connection purposes |
| Simoncic et al. [76] | Depression                 | Daily average time on SNS                         | NS                                          |                                                                                                                          |
| Steers et al. [77]   | Depression                 | Daily average time on SNS                         | + (cross-sectional)<br><br>NS (ESM diaries) | Social comparison was a mediator                                                                                         |
| Tandoc et al. [78]   | Depression                 | Daily average time on SNS                         | NS                                          |                                                                                                                          |
| Hong et al. [60]     | Depression                 | Daily average time on SNS (apps, news feed, chat) | NS                                          |                                                                                                                          |
| Davila et al. [54]   | Depression                 | Daily average time on SNS interacting with others | NS                                          |                                                                                                                          |
| Rosen et al. [74]    | Depression                 | Frequency of SNS use                              | NS                                          |                                                                                                                          |
| Shaw et al. [75]     | Depression                 | Frequency of SNS use                              | NS                                          |                                                                                                                          |

| <b>Study</b>         | <b>Mental Health Focus</b> | <b>Key SNS Variables</b>                          | <b>Direct Associations</b> | <b>Additional Notes and Complex Relationships</b>                                                                                                          |
|----------------------|----------------------------|---------------------------------------------------|----------------------------|------------------------------------------------------------------------------------------------------------------------------------------------------------|
| Shaw et al. [75]     | Depression                 | Frequency of SNS Interactive Communication Use    | +                          |                                                                                                                                                            |
| Shaw et al. [75]     | Depression                 | Frequency of SNS Content Production Use           | +                          |                                                                                                                                                            |
| Shaw et al. [75]     | Depression                 | Frequency of Passive SNS use                      | NS                         |                                                                                                                                                            |
| Tandoc et al. [78]   | Depression                 | Frequency of Passive SNS use                      | NS                         | Significant negative association with depression when mediated by Facebook envy                                                                            |
| Rosen et al. [74]    | Depression                 | Frequency of impression/profile management on SNS | +                          |                                                                                                                                                            |
| Simoncic et al. [76] | Depression                 | Frequency of Active SNS use                       | NS                         | Active uses of Facebook were associated with lower depression in a three-way interaction also including gender and neuroticism (female, high neuroticism). |
| Davila et al. [54]   | Depression                 | Number of times checking SNS per day              | NS                         |                                                                                                                                                            |
| Lin et al. [66]      | Depression                 | Number of times checking SNS per week             | +                          |                                                                                                                                                            |

| <b>Study</b>            | <b>Mental Health Focus</b> | <b>Key SNS Variables</b>                          | <b>Direct Associations</b> | <b>Additional Notes and Complex Relationships</b>                                                                        |
|-------------------------|----------------------------|---------------------------------------------------|----------------------------|--------------------------------------------------------------------------------------------------------------------------|
| Koc & Gulyagci [62]     | Depression                 | Weekly average time on SNS                        | NS                         |                                                                                                                          |
| Mok et al. [70]         | Depression                 | Weekly average time on SNS                        | *                          | No inferential statistics are presented                                                                                  |
| Morin-Major et al. [71] | Depression                 | Weekly average time on SNS                        | NS                         | Findings were also NS in reference to the frequency of peer interactions and self-presentation behaviours                |
| Wright et al. [79]      | Depression                 | Weekly average time on SNS                        | +                          |                                                                                                                          |
| Farahani et al. [55]    | Anxiety                    | Daily average time on SNS                         | +                          |                                                                                                                          |
| Labrague [64]           | Anxiety                    | Daily average time on SNS                         | +                          |                                                                                                                          |
| Rae & Lonborg [73]      | Anxiety                    | Daily average time on SNS                         | NS                         | Significant interaction-relationship is positive for those higher in motivations to use Facebook for connection purposes |
| Feinstein et al. [56]   | Anxiety                    | Daily average time on SNS interacting with others | NS                         |                                                                                                                          |
| Koc & Gulyagci [62]     | Anxiety                    | Weekly average time on SNS                        | NS                         |                                                                                                                          |
| Baker & Jeske [80]      | Social Anxiety             | Daily average time on SNS                         | NS                         |                                                                                                                          |

| <b>Study</b>          | <b>Mental Health Focus</b>            | <b>Key SNS Variables</b>                          | <b>Direct Associations</b> | <b>Additional Notes and Complex Relationships</b>                                                                        |
|-----------------------|---------------------------------------|---------------------------------------------------|----------------------------|--------------------------------------------------------------------------------------------------------------------------|
| Baker & Jeske [80]    | Social Anxiety<br>(Facebook-specific) | Daily average time on SNS                         | -                          |                                                                                                                          |
| Green et al. [59]     | Social Anxiety                        | Daily average time on SNS                         | NS                         |                                                                                                                          |
| Lee-Won et al. [65]   | Social Anxiety                        | Daily average time on SNS                         | NS                         |                                                                                                                          |
| Feinstein et al. [56] | Social Anxiety                        | Daily average time on SNS interacting with others | NS                         |                                                                                                                          |
| Fernandez et al. [57] | Social Anxiety                        | Frequency of SNS use                              | NS                         |                                                                                                                          |
| Shaw et al. [75]      | Social Anxiety                        | Frequency of SNS use                              | +                          | When included in regression with other functions of SNS use this becomes NS                                              |
| McCord et al. [69]    | Social Anxiety                        | Frequency of Social SNS use                       | NS                         | Significant positive association when moderated by the degree of 'Anxiety on Facebook' only for those in the high group. |
| Shaw et al. [75]      | Social Anxiety                        | Frequency of SNS Interactive Communication        | NS                         |                                                                                                                          |
| Shaw et al. [75]      | Social Anxiety                        | Frequency of SNS Content Production               | NS                         |                                                                                                                          |

| Study                   | Mental Health Focus                                     | Key SNS Variables                                 | Direct Associations | Additional Notes and Complex Relationships                                                                                                                                                                                           |
|-------------------------|---------------------------------------------------------|---------------------------------------------------|---------------------|--------------------------------------------------------------------------------------------------------------------------------------------------------------------------------------------------------------------------------------|
| Shaw et al. [75]        | Social Anxiety                                          | Frequency of Passive SNS Use                      | +                   | Remains significant when controlling for depression and anxiety symptoms and was mediated by brooding.<br><br>An alternative mediation model provided support for social anxiety as a mediator of passive Facebook use and brooding. |
| Burke & Ruppel [105]    | Social Anxiety                                          | Weekly average time on SNS                        | NS                  |                                                                                                                                                                                                                                      |
| Frison et al. [81]      | <i>Life Satisfaction</i>                                | Daily average time on SNS                         | -                   |                                                                                                                                                                                                                                      |
| Locatelli et al. [67]   | <i>Life Satisfaction</i>                                | Daily average time on SNS                         | NS                  |                                                                                                                                                                                                                                      |
| Rae & Lonborg [73]      | <i>Psychological Well-being</i>                         | Daily average time on SNS                         | NS                  |                                                                                                                                                                                                                                      |
| Baker & Jeske [80]      | <i>Self-Esteem</i>                                      | Daily average time on SNS                         | NS                  |                                                                                                                                                                                                                                      |
| Hong et al. [60]        | <i>Self-Esteem</i>                                      | Daily average time on SNS (apps, news feed, chat) | NS                  |                                                                                                                                                                                                                                      |
| Kross et al. [63]       | <i>Life Satisfaction</i><br><i>Affective well-being</i> | Frequency of SNS use                              | -                   | Depressive symptoms did not moderate these relationships                                                                                                                                                                             |
| Morin-Major et al. [71] | <i>Self-Esteem</i>                                      | Weekly average time on SNS                        | NS                  |                                                                                                                                                                                                                                      |

|                                  | <b>Study</b>            | <b>Mental Health Focus</b> | <b>Key SNS Variables</b>           | <b>Direct Associations</b> | <b>Additional Notes and Complex Relationships</b>                                                                  |
|----------------------------------|-------------------------|----------------------------|------------------------------------|----------------------------|--------------------------------------------------------------------------------------------------------------------|
| <b>Size and Structure of SNS</b> | Banjanin et al. [53]    | Depression                 | Number of Facebook Friends         | NS                         |                                                                                                                    |
|                                  | Fernandez et al. [57]   | Depression                 | Number of Facebook Friends         | NS                         |                                                                                                                    |
|                                  | Labrague [64]           | Depression                 | Number of Facebook Friends         | NS                         |                                                                                                                    |
|                                  | Locatelli et al. [67]   | Depression                 | Number of Facebook Friends         | NS                         |                                                                                                                    |
|                                  | Morin-Major et al. [71] | Depression                 | Number of Facebook Friends         | NS                         |                                                                                                                    |
|                                  | Park et al. [84]        | Depression                 | Number of Facebook Friends         | -                          | Group Differences: depressed participants had significantly fewer Facebook friends than non-depressed participants |
|                                  | Park et al. [83]        | Depression (BDI)           | Number of Facebook Friends         | -                          | NS when depression was measured by the CES-D                                                                       |
|                                  | Rae & Lonborg [73]      | Depression                 | Number of Facebook Friends         | -                          |                                                                                                                    |
|                                  | Rosen et al. [74]       | Depression                 | Number of Facebook Friends (index) | -                          | Technology attitudes and anxiety were held constant.                                                               |
|                                  | Tandoc et al. [78]      | Depression                 | Number of Facebook Friends         | NS                         |                                                                                                                    |
|                                  | Wright et al. [79]      | Depression                 | Number of Facebook Friends         | NS                         |                                                                                                                    |

| <b>Study</b>          | <b>Mental Health Focus</b> | <b>Key SNS Variables</b>                       | <b>Direct Associations</b>               | <b>Additional Notes and Complex Relationships</b>                                                                                                                             |
|-----------------------|----------------------------|------------------------------------------------|------------------------------------------|-------------------------------------------------------------------------------------------------------------------------------------------------------------------------------|
| Homan et al. [89]     | Depression                 | Network Structure Characteristics              | Differ in high and low depression groups | High depression scores have significantly less integrated online social networks                                                                                              |
| Takahashi et al. [90] | Depression                 | Network Structure Characteristics              |                                          | Described network characteristics and connections across different levels of depression severity. Qualitative analysis is also included                                       |
| Mota-Pereira [88]     | Depression                 | Facebook use with psychiatrist as a “friend”   | -                                        | “Facebook Use” group and “Facebook Use with a psychiatrist as a friend” group, depressive symptoms decreased significantly over a 3-month period compared to a control group. |
| Tsai et al. [87]      | Depression                 | Accepting friend requests from former partners | +                                        |                                                                                                                                                                               |
| Tsai et al. [87]      | Anxiety                    | Accepting friend requests from former partners | +                                        |                                                                                                                                                                               |
| Labrague [64]         | Anxiety                    | Number of Facebook Friends                     | NS                                       |                                                                                                                                                                               |
| Rae & Lonborg [73]    | Anxiety                    | Number of Facebook Friends                     | NS                                       |                                                                                                                                                                               |



| <b>Study</b>                                         | <b>Mental Health Focus</b>  | <b>Key SNS Variables</b>            | <b>Direct Associations</b>                          | <b>Additional Notes and Complex Relationships</b>                                                              |
|------------------------------------------------------|-----------------------------|-------------------------------------|-----------------------------------------------------|----------------------------------------------------------------------------------------------------------------|
| Davidson & Farquhar [86]                             | Anxiety (Facebook-specific) | Number of unique groups on Facebook | NS                                                  |                                                                                                                |
| Davidson & Farquhar [86]                             | Social Anxiety              | Number of unique groups on Facebook | NS                                                  |                                                                                                                |
| Fernandez et al. [57]                                | Social Anxiety              | Number of Facebook Friends          | -                                                   |                                                                                                                |
| Weidmann & Levinson [82]                             | Social Anxiety              | Number of Facebook Friends          | -                                                   |                                                                                                                |
| Locatelli et al. [67]                                | <i>Life Satisfaction</i>    | Number of Facebook Friends          | NS                                                  |                                                                                                                |
| Rae & Lonborg [73]                                   | <i>Life Satisfaction</i>    | Number of Facebook Friends          | NS                                                  | Significant interaction – relationship is positive for those high in friendship motivations for using Facebook |
| Rae & Lonborg [73]                                   | <i>Positive Affect</i>      | Number of Facebook Friends          | +                                                   |                                                                                                                |
| Morin-Major et al. [71]                              | <i>Self-Esteem</i>          | Number of Facebook Friends          | NS                                                  |                                                                                                                |
| <b>Language Features and Observable SNS Activity</b> |                             |                                     |                                                     |                                                                                                                |
| De Choudhury et al. [91]                             | Depression                  | Twitter Use Data                    | Predictive language and SNS use features identified |                                                                                                                |

| <b>Study</b>             | <b>Mental Health Focus</b> | <b>Key SNS Variables</b>  | <b>Direct Associations</b>                          | <b>Additional Notes and Complex Relationships</b>                                                              |
|--------------------------|----------------------------|---------------------------|-----------------------------------------------------|----------------------------------------------------------------------------------------------------------------|
| Tsugawa et al. [96]      | Depression                 | Twitter Use Data          | Predictive language and SNS use features identified |                                                                                                                |
| De Choudhury et al. [92] | Postpartum Depression      | Facebook Use Data         | Predictive language and SNS use features identified |                                                                                                                |
| Dumitrache et al. [97]   | Depression                 | Identity items on profile | +                                                   |                                                                                                                |
| Fernandez et al. [57]    | Depression                 | Identity items on profile | +                                                   | Depression was associated with a greater amount of profile information posted                                  |
| Moreno et al. [85]       | Depression                 | Status update content     | Predictive language                                 | Depression symptoms can be observed and coded based on the DSM-IV criteria for MDD                             |
| Moreno et al. [94]       | Depression                 | Status update content     | +                                                   | Depression displays in status updates (based on the DSM-IV criteria for MDD) were associated with PHQ-9 scores |

| <b>Study</b>     | <b>Mental Health Focus</b> | <b>Key SNS Variables</b>              | <b>Direct Associations</b> | <b>Additional Notes and Complex Relationships</b>                                                                                                                     |
|------------------|----------------------------|---------------------------------------|----------------------------|-----------------------------------------------------------------------------------------------------------------------------------------------------------------------|
| Park et al. [84] | Depression                 | Inbound comments                      | NS                         | Group differences- fewer inbound comments to depressed participants compared to non-depressed participants                                                            |
| Park et al. [84] | Depression                 | Inbound likes                         | NS                         | Group differences- fewer inbound likes to depressed participants compared to non-depressed participants                                                               |
| Park et al. [84] | Depression                 | Outbound comments                     | -                          | Group differences- fewer outbound comments from depressed participants compared to non-depressed participants                                                         |
| Park et al. [84] | Depression                 | Wall post rate                        | +                          |                                                                                                                                                                       |
| Park et al. [93] | Depression                 | Positive disclosure in status updates | NS                         | Group differences- fewer between those with MDD and those without. MDD participants disclose more negative and less positive content than non-depressed participants. |
| Park et al. [93] | Depression                 | Negative disclosure in status updates | NS                         |                                                                                                                                                                       |

| <b>Study</b>             | <b>Mental Health Focus</b> | <b>Key SNS Variables</b>           | <b>Direct Associations</b> | <b>Additional Notes and Complex Relationships</b>                                             |
|--------------------------|----------------------------|------------------------------------|----------------------------|-----------------------------------------------------------------------------------------------|
| Settani & Marengo [95]   | Depression                 | Positive emotion in status updates | NS                         |                                                                                               |
| Settani & Marengo [95]   | Depression                 | Negative emotion in status updates | +                          |                                                                                               |
| Settani & Marengo [95]   | Anxiety                    | Positive emotion in status updates | NS                         |                                                                                               |
| Settani & Marengo [95]   | Anxiety                    | Negative emotion in status updates | +                          |                                                                                               |
| Fernandez et al. [57]    | Social Anxiety             | Identity items on profile          | +                          | Social interaction anxiety was associated with a greater amount of profile information posted |
| Fernandez et al. [57]    | Social Anxiety             | Number of posts by friends         | NS                         |                                                                                               |
| Fernandez et al. [57]    | Social Anxiety             | Number of status updates           | NS                         |                                                                                               |
| große Deters et al. [98] | Social Anxiety             | Number of status updates           | NS                         |                                                                                               |
| große Deters et al. [98] | Social Anxiety             | Number of likes on status updates  | NS                         |                                                                                               |

|       | <b>Study</b>                                  | <b>Mental Health Focus</b> | <b>Key SNS Variables</b>                                | <b>Direct Associations</b> | <b>Additional Notes and Complex Relationships</b>                                                                                                                                                                                              |
|-------|-----------------------------------------------|----------------------------|---------------------------------------------------------|----------------------------|------------------------------------------------------------------------------------------------------------------------------------------------------------------------------------------------------------------------------------------------|
|       | Weidmann & Levinson [82]                      | Social Anxiety             | Facebook Profile Inactivity                             | NS                         | Group Differences- participants listing a single relationship status compared to a relationship with other people and an absence of status updates compared to profiles with status updates had significantly higher scores of social anxiety. |
|       | Weidmann & Levinson [82]                      | Social Anxiety             | Observer ratings of social anxiety from profile content | +                          |                                                                                                                                                                                                                                                |
| <hr/> |                                               |                            |                                                         |                            |                                                                                                                                                                                                                                                |
|       | <b>SNS for Self-disclosure and expression</b> |                            |                                                         |                            |                                                                                                                                                                                                                                                |
|       | Baker & Moore [100]                           | Depression                 | Intention to blog                                       | +                          | Group differences- intending bloggers had significantly higher depression scores than non-bloggers                                                                                                                                             |
|       | Baker & Moore [101]                           | Depression                 | Blogging on MySpace                                     | NS                         | Bloggers (and non-bloggers) had no change in depression scores between T0 and T1 (2-month interval)                                                                                                                                            |
|       | große Deters & Mehl [102]                     | Depression                 | Increased status posting                                | NS                         |                                                                                                                                                                                                                                                |

| <b>Study</b>                                   | <b>Mental Health Focus</b>                    | <b>Key SNS Variables</b>                                  | <b>Direct Associations</b> | <b>Additional Notes and Complex Relationships</b>                                                                       |
|------------------------------------------------|-----------------------------------------------|-----------------------------------------------------------|----------------------------|-------------------------------------------------------------------------------------------------------------------------|
| Locatelli et al. [67]                          | Depression                                    | Frequency of negative status updates                      | +                          | Rumination indirectly mediated the association between negative posts and depression                                    |
| Locatelli et al. [67]                          | Depression                                    | Frequency of positive status updates                      | NS                         | Rumination indirectly mediated the association between positive posts and depression (significant negative association) |
| Baker & Moore [100]                            | Anxiety                                       | Intention to blog                                         | +                          | Group differences- intending bloggers had significantly higher anxiety scores than non-bloggers                         |
| Baker & Moore [101]                            | Anxiety                                       | Bloggging on MySpace                                      | NS                         | Bloggers (and non-bloggers) had no change in anxiety scores between T0 and T1 (2-month interval)                        |
| Davidson & Farquhar [86]<br>Baker & Jeske [80] | Anxiety (Facebook-specific)<br>Social Anxiety | Self-presentation (role conflict)<br>Assertiveness on SNS | +<br>-                     | Group differences – Higher social anxiety has lower assertiveness scores than low social anxiety                        |

| <b>Study</b>              | <b>Mental Health Focus</b> | <b>Key SNS Variables</b>          | <b>Direct Associations</b> | <b>Additional Notes and Complex Relationships</b>                                                                                                                              |
|---------------------------|----------------------------|-----------------------------------|----------------------------|--------------------------------------------------------------------------------------------------------------------------------------------------------------------------------|
| Casale & Fioravanti [104] | Social Anxiety             | Assertiveness on SNS              | +                          | Both males and females have a positive association between social anxiety and the feelings of assertiveness in SNS communication compared to face-to-face settings.            |
| Bodroža & Jovanović [106] | Social Anxiety             | Self-presentation                 | +                          | Higher social anxiety was associated with greater concern of presenting a negative self-image on Facebook                                                                      |
| Burke & Ruppel [105]      | Social Anxiety             | Self-presentation                 | +                          |                                                                                                                                                                                |
| Casale & Fioravanti [104] | Social Anxiety             | Self-presentation                 | +                          | Both males and females have a positive association between social anxiety and the feeling they have more control over SNS self-presentation compared to face-to-face settings. |
| Davidson & Farquhar [86]  | Social Anxiety             | Self-presentation (role conflict) | +                          |                                                                                                                                                                                |

| <b>Study</b>             | <b>Mental Health Focus</b> | <b>Key SNS Variables</b>                         | <b>Direct Associations</b>  | <b>Additional Notes and Complex Relationships</b>                                                                                                                            |
|--------------------------|----------------------------|--------------------------------------------------|-----------------------------|------------------------------------------------------------------------------------------------------------------------------------------------------------------------------|
| große Deters et al. [98] | Social Anxiety             | Social Reciprocity and Valence of Status Updates | + (Study 1)<br>NS (Study 2) | Positive posts elicit a greater number of 'likes', particularly for those high in social anxiety. This was not supported in Study 2                                          |
| Ghosh & Dasgupta [99]    | Social Anxiety             | SNS membership                                   | -                           | Group differences – Facebook users had significantly lower social anxiety scores than non-users. This difference was more pronounced for female non-users compared to males. |
| Green et al. [59]        | Social Anxiety             | SNS self-disclosure (public)                     | NS                          |                                                                                                                                                                              |
| Green et al. [59]        | Social Anxiety             | SNS self-disclosure (private)                    | NS                          | Significant mediated pathway from social anxiety to private Facebook self-disclosure via the characteristics of online communication and disinhibition.                      |
| Locatelli et al. [67]    | <i>Life Satisfaction</i>   | Frequency of negative status updates             | -                           | Rumination indirectly mediated the association between negative posts and life satisfaction                                                                                  |



| <b>Study</b>                   | <b>Mental Health Focus</b>  | <b>Key SNS Variables</b>                     | <b>Direct Associations</b> | <b>Additional Notes and Complex Relationships</b>                                                                                                                                                                                         |
|--------------------------------|-----------------------------|----------------------------------------------|----------------------------|-------------------------------------------------------------------------------------------------------------------------------------------------------------------------------------------------------------------------------------------|
| Locatelli et al. [67]          | <i>Life Satisfaction</i>    | Frequency of positive status updates         | NS                         | Rumination indirectly mediated the association between positive posts and life satisfaction (significant positive association)                                                                                                            |
| große Deters & Mehl [102]      | <i>Loneliness</i>           | Increased status posting                     | +                          | Loneliness significantly decreased in the experimental group (increased posting) from T1 to T2 (1-week interval) and did not change in the control condition. The decrease in loneliness was mediated by feelings of social connectedness |
| Ghosh & Dasgupta [99]          | <i>Self-Esteem</i>          | Facebook membership                          | +                          | Group differences – Facebook users had significantly higher self-esteem scores than non-users                                                                                                                                             |
| große Deters & Mehl [102]      | <i>Subjective Happiness</i> | Increased status posting                     | NS                         |                                                                                                                                                                                                                                           |
| <b>Quality of Interactions</b> |                             |                                              |                            |                                                                                                                                                                                                                                           |
| Davila et al. [54]             | Depression                  | Perceived frequency of negative interactions | +                          | Greater perceived frequency of negative interactions (T1) predicted increases in depressive symptoms (T2)                                                                                                                                 |

| <b>Study</b>          | <b>Mental Health Focus</b> | <b>Key SNS Variables</b>                     | <b>Direct Associations</b>  | <b>Additional Notes and Complex Relationships</b>                                                                                                           |
|-----------------------|----------------------------|----------------------------------------------|-----------------------------|-------------------------------------------------------------------------------------------------------------------------------------------------------------|
| Davila et al. [54]    | Depression                 | Perceived frequency of positive interactions | NS (Study 1)<br>- (Study 2) | Lesser perceived frequency of positive interactions (T1) predicted increases in depressive symptoms (T2)                                                    |
| Feinstein et al. [56] | Depression                 | Perceived frequency of negative interactions | +                           | Depressive symptoms at T1 predicted more negative interactions at T2 with close friends and romantic partners                                               |
| Feinstein et al. [56] | Depression                 | Perceived frequency of positive interactions | -                           | Depressive symptoms at T1 predicted less positive interactions at T2 with romantic partners                                                                 |
| Frison et al. [81]    | Depression                 | Negative peer experiences on SNSs            | +                           | Cross-lagged analyses suggested a unidirectional relationship between depression (T1) and increases in negative Facebook experiences (T2; 6-month interval) |
| Landoll et al. [107]  | Depression                 | Negative peer experiences on SNSs            | +                           |                                                                                                                                                             |

| <b>Study</b>           | <b>Mental Health Focus</b> | <b>Key SNS Variables</b>                         | <b>Direct Associations</b> | <b>Additional Notes and Complex Relationships</b>                                                                                                                          |
|------------------------|----------------------------|--------------------------------------------------|----------------------------|----------------------------------------------------------------------------------------------------------------------------------------------------------------------------|
| Moberg & Anestis [108] | Depression                 | SNS interactions (very negative – very positive) | -                          | When controlling for depression, interaction ratings and thwarted belongingness had a significant negative relationship                                                    |
| Szwedo et al. [103]    | Depression                 | Positive peer relationship quality               | NS                         |                                                                                                                                                                            |
| Szwedo et al. [103]    | Depression                 | Negative peer relationship quality               | -<br>+                     | Symptoms at age 13 (T1) predicted less deviancy talk from peers at age 20 (T2)<br><br>Symptoms at age 20 (T2) predicted more verbally aggressive comments from peers at T2 |
| Feinstein et al. [56]  | Anxiety                    | Perceived frequency of negative interactions     | +                          | Global Anxiety symptoms at T1 did not predict interactions at T2, though cross-sectional associations were observed.                                                       |
| Feinstein et al. [56]  | Anxiety                    | Perceived frequency of positive interactions     | -                          |                                                                                                                                                                            |

| <b>Study</b>          | <b>Mental Health Focus</b> | <b>Key SNS Variables</b>                     | <b>Direct Associations</b> | <b>Additional Notes and Complex Relationships</b>                                                                                                                                                                                                         |
|-----------------------|----------------------------|----------------------------------------------|----------------------------|-----------------------------------------------------------------------------------------------------------------------------------------------------------------------------------------------------------------------------------------------------------|
| Feinstein et al. [56] | Social Anxiety             | Perceived frequency of negative interactions | +                          | Social Anxiety symptoms at T1 did not predict interactions at T2, though cross-sectional associations were observed                                                                                                                                       |
| Feinstein et al. [56] | Social Anxiety             | Perceived frequency of positive interactions | -                          | Relationship is NS when only observing interactions with close friends                                                                                                                                                                                    |
| Hong et al. [109]     | Social Anxiety (online)    | Facebook continuance intention               | -                          | Belief that virtual communities are dangerous (including the potential to encounter hostile/negative interactions) is positively associated with online and general social anxiety subsequently links to reduced continuance intention for using Facebook |
| Landoll et al. [107]  | Social Anxiety             | Negative peer experiences on SNSs            | +                          |                                                                                                                                                                                                                                                           |
| Szwedo et al. [103]   | Social Anxiety             | Positive Peer Relationship Quality           | +                          | Symptoms at age 20 (T2) predicted more supportive comments from peers at T2                                                                                                                                                                               |

| <b>Study</b>             | <b>Mental Health Focus</b> | <b>Key SNS Variables</b>           | <b>Direct Associations</b> | <b>Additional Notes and Complex Relationships</b>                                                                                                                                     |
|--------------------------|----------------------------|------------------------------------|----------------------------|---------------------------------------------------------------------------------------------------------------------------------------------------------------------------------------|
| Szwedo et al. [103]      | Social Anxiety             | Negative Peer Relationship Quality | -                          | Symptoms at age 13 (T1) predicted fewer verbally aggressive comments from peers at age 20 (T2)                                                                                        |
| Frison et al. [81]       | <i>Life Satisfaction</i>   | Negative peer experiences on SNSs  | -                          | Cross-lagged analyses suggested a bidirectional relationship between life satisfaction (T1/T2) and negative Facebook experiences (T1/T2)                                              |
| <b>Social Support</b>    |                            |                                    |                            |                                                                                                                                                                                       |
| Frison & Eggermont [110] | Depression                 | Perceived Social Support (via SNS) | -                          |                                                                                                                                                                                       |
| Frison & Eggermont [110] | Depression                 | Social Support Seeking (via SNS)   | +                          | Social support seeking through Facebook and its association with depressed mood was mediated by perceived social support (greater perceived social support decreased depressed mood). |

| <b>Study</b>           | <b>Mental Health Focus</b> | <b>Key SNS Variables</b>                                                                   | <b>Direct Associations</b> | <b>Additional Notes and Complex Relationships</b>                                                                                                                                             |
|------------------------|----------------------------|--------------------------------------------------------------------------------------------|----------------------------|-----------------------------------------------------------------------------------------------------------------------------------------------------------------------------------------------|
| Frison et al. [81]     | Depression                 | Perceived Friend Support (via SNS)-moderator<br><br><i>(Negative Facebook experiences)</i> | -                          | Moderated by perceived friend support (low, medium, high), the association between negative Facebook experiences (T1) and depressed mood (T2) was significant only for low and medium levels. |
| McCloskey et al. [112] | Depression                 | Perceived social support (via SNS)                                                         | NS                         |                                                                                                                                                                                               |
| McCloskey et al. [112] | Depression                 | Emotional support (via SNS)                                                                | +                          |                                                                                                                                                                                               |
| McCloskey et al. [112] | Depression                 | Negative social support (via SNS)                                                          | +                          |                                                                                                                                                                                               |
| McCloskey et al. [112] | Depression                 | Instrumental support (via SNS)                                                             | NS                         |                                                                                                                                                                                               |
| Park et al. [93]       | Depression                 | Perceived Social Support (via SNS)                                                         | -                          |                                                                                                                                                                                               |
| Park et al. [93]       | Depression                 | Actual Social Support (via SNS)                                                            | NS                         | Significant positive relationship where the individual was disclosing negative sentiment and they were higher in depressive symptoms.                                                         |

| <b>Study</b>          | <b>Mental Health Focus</b> | <b>Key SNS Variables</b>                         | <b>Direct Associations</b>          | <b>Additional Notes and Complex Relationships</b>                                                                                                                                                                                          |
|-----------------------|----------------------------|--------------------------------------------------|-------------------------------------|--------------------------------------------------------------------------------------------------------------------------------------------------------------------------------------------------------------------------------------------|
| Park et al. [93]      | Depression                 | Discrepancy between actual and perceived support | +                                   | Group differences -discrepancy is larger for individuals with MDD compared to non-depressed participants.                                                                                                                                  |
| Wright et al. [79]    | Depression                 | SNS Social support satisfaction                  | -                                   | Path from higher CMC competence predicts more Facebook Social Support Satisfaction and subsequently lower depression scores. Motives to use Facebook for social integration and interpersonal communication also contributed to this model |
| Indian & Grieve [111] | Social Anxiety (high)      | Perceived social support (via SNS)               | + ( <i>subjective well-being</i> )  | Controlled for offline social support<br><br>Group comparisons also revealed no significant differences in perceived Facebook social support between the low and high social anxiety groups                                                |
| Indian & Grieve [111] | Social Anxiety (low)       | Perceived social support (via SNS)               | NS ( <i>subjective well-being</i> ) |                                                                                                                                                                                                                                            |

| <b>Study</b>                | <b>Mental Health Focus</b> | <b>Key SNS Variables</b>                                                                     | <b>Direct Associations</b> | <b>Additional Notes and Complex Relationships</b>                                                                                                                                                |
|-----------------------------|----------------------------|----------------------------------------------------------------------------------------------|----------------------------|--------------------------------------------------------------------------------------------------------------------------------------------------------------------------------------------------|
| Frison et al. [81]          | <i>Life Satisfaction</i>   | Perceived Friend Support (via SNS) - moderator<br><br><i>(Negative Facebook experiences)</i> | +                          | Moderated by perceived friend support (low, medium, high), the association between negative Facebook experiences (T1) and life satisfaction (T2) was significant only for low and medium levels. |
| McCloskey et al. [112]      | <i>Quality of Life</i>     | Perceived social support (via SNS)                                                           | NS                         |                                                                                                                                                                                                  |
| McCloskey et al. [112]      | <i>Quality of Life</i>     | Emotional support (via SNS)                                                                  | -                          | Direct association only with psychological well-being of the WHOQOL-BREF domains                                                                                                                 |
| McCloskey et al. [112]      | <i>Quality of Life</i>     | Negative social support (via SNS)                                                            | -                          |                                                                                                                                                                                                  |
| McCloskey et al. [112]      | <i>Quality of Life</i>     | Instrumental support (via SNS)                                                               | NS                         |                                                                                                                                                                                                  |
| <b>Social Connectedness</b> |                            |                                                                                              |                            |                                                                                                                                                                                                  |
| Grieve et al. [113]         | Depression                 | Facebook social connectedness                                                                | -                          |                                                                                                                                                                                                  |
| Grieve et al. [113]         | Anxiety                    | Facebook social connectedness                                                                | -                          |                                                                                                                                                                                                  |
| Grieve et al. [113]         | <i>Life Satisfaction</i>   | Facebook social connectedness                                                                | +                          |                                                                                                                                                                                                  |



|                          | <b>Study</b>       | <b>Mental Health Focus</b> | <b>Key SNS Variables</b>           | <b>Direct Associations</b> | <b>Additional Notes and Complex Relationships</b>                                                                                                                                                                     |
|--------------------------|--------------------|----------------------------|------------------------------------|----------------------------|-----------------------------------------------------------------------------------------------------------------------------------------------------------------------------------------------------------------------|
| <b>Social Comparison</b> | Appel et al. [116] | Depression                 | Envy                               | +                          | Significant interaction – envy was greater in response to viewing an attractive Facebook profile, with it being more so in a depressed group compared to a non-depressed group                                        |
|                          | Tandoc et al. [78] | Depression                 | Envy                               | +                          | Facebook envy mediates the association between surveillance uses of Facebook and depression                                                                                                                           |
|                          | Lup et al. [68]    | Depression                 | Downward Social Comparison on SNSs | -                          | Social comparison was an indirect mediator of the relationship between the frequency of Instagram use and depression. This pathway was additionally moderated by the proportion of strangers followed in the network. |
|                          | Steers et al. [77] | Depression                 | Downward Social Comparison on SNSs | +                          | Social comparison mediated the relationship between time spent on Facebook and depressive symptoms                                                                                                                    |

| <b>Study</b>           | <b>Mental Health Focus</b> | <b>Key SNS Variables</b>                  | <b>Direct Associations</b> | <b>Additional Notes and Complex Relationships</b>                                                                                                           |
|------------------------|----------------------------|-------------------------------------------|----------------------------|-------------------------------------------------------------------------------------------------------------------------------------------------------------|
| Steers et al. [77]     | Depression                 | Non-directional Social Comparison on SNSs | +                          | Social comparison mediated the relationship between time spent on Facebook and depressive symptoms                                                          |
| Steers et al. [77]     | Depression                 | Upward Social Comparison on SNSs          | +                          | Social comparison mediated the relationship between time spent on Facebook and depressive symptoms                                                          |
| Feinstein et al. [115] | Depression                 | Social Comparison on SNSs                 | +                          | More negative social comparison on Facebook at T1 was associated with increases in depressive symptoms at T2 via increases in rumination (3-week interval). |
| Lee [114]              | Depression                 | Social Comparison on SNSs                 | +                          |                                                                                                                                                             |
| Lee [114]              | Anxiety                    | Social Comparison Frequency on SNSs       | +                          |                                                                                                                                                             |
| Appel et al. [116]     | <i>Self-Esteem</i>         | Envy                                      | -                          |                                                                                                                                                             |
| Lee [114]              | <i>Self-Esteem</i>         | Social Comparison on SNSs                 | -                          |                                                                                                                                                             |

|                                     | <b>Study</b>            | <b>Mental Health Focus</b> | <b>Key SNS Variables</b>                   | <b>Direct Associations</b> | <b>Additional Notes and Complex Relationships</b>                                                                          |
|-------------------------------------|-------------------------|----------------------------|--------------------------------------------|----------------------------|----------------------------------------------------------------------------------------------------------------------------|
| <b>Addictive or Problematic Use</b> | Andreassen et al. [117] | Depression                 | Addictive SNS use                          | -                          | Controlled for demographic characteristics, OCD, and ADHD                                                                  |
|                                     | Hanprathet et al. [119] | Depression                 | Addictive SNS use                          | +                          |                                                                                                                            |
|                                     | Hong et al. [60]        | Depression                 | Addictive SNS use                          | +                          |                                                                                                                            |
|                                     | Koc & Gulyagci [62]     | Depression                 | Addictive SNS use                          | +                          |                                                                                                                            |
|                                     | Wegmann et al. [121]    | Depression                 | Addictive SNS Use                          | +                          | Internet use expectancies and self-regulation mediate the relationship between SNS addiction and depression/social anxiety |
|                                     | Blachnio et al. [118]   | Depression                 | Facebook Intrusion (behavioural addiction) | +                          |                                                                                                                            |
|                                     | Giota & Kleftras [58]   | Depression                 | Problematic SNS use                        | +                          | NS when accounting for personality and average daily SNS use                                                               |

| <b>Study</b>              | <b>Mental Health Focus</b> | <b>Key SNS Variables</b> | <b>Direct Associations</b> | <b>Additional Notes and Complex Relationships</b>                                                                                                                                                       |
|---------------------------|----------------------------|--------------------------|----------------------------|---------------------------------------------------------------------------------------------------------------------------------------------------------------------------------------------------------|
| Moreau et al. [120]       | Depression                 | Problematic SNS use      | +                          | Cluster analysis indicated that the 'borderline group' which had significantly higher social anxiety and depression scores than two other clusters, also had a higher level of problematic Facebook use |
| Andreassen et al. [117]   | Anxiety                    | Addictive SNS use        | +                          | Controlled for demographic characteristics, OCD, and ADHD                                                                                                                                               |
| Hanprathet et al. [119]   | Anxiety                    | Addictive SNS use        | +                          |                                                                                                                                                                                                         |
| Bodroža & Jovanović [106] | Social Anxiety             | Addictive SNS use        | +                          |                                                                                                                                                                                                         |
| Wegmann et al. [121]      | Social Anxiety             | Addictive SNS Use        | +                          |                                                                                                                                                                                                         |
| Casale & Fioravanti [104] | Social Anxiety             | Problematic SNS use      | +                          | Males – The relationship between social anxiety and problematic SNS use is indirectly mediated by the <i>need for self-presentation</i>                                                                 |

| <b>Study</b>                              | <b>Mental Health Focus</b>           | <b>Key SNS Variables</b>                  | <b>Direct Associations</b> | <b>Additional Notes and Complex Relationships</b>                                                                                      |
|-------------------------------------------|--------------------------------------|-------------------------------------------|----------------------------|----------------------------------------------------------------------------------------------------------------------------------------|
| Lee-Won et al. [65]                       | Social Anxiety                       | Problematic SNS use                       | +                          | NSA moderated this relationship with it being more pronounced for those with high and medium NSA, and becoming NS for those low in NSA |
| Moreau et al. [120]<br>Hong et al. [60]   | Social Anxiety<br><i>Self Esteem</i> | Problematic SNS use<br>Facebook Addiction | +<br>NS                    |                                                                                                                                        |
| <b>Physiological Arousal and Facebook</b> |                                      |                                           |                            |                                                                                                                                        |
| Raunch et al. [122]                       | Social Anxiety                       | Facebook exposure                         | +                          | High social anxiety had greater physiological arousal in a face-to-face encounter after prior exposure to a Facebook profile.          |

*Note:* “+” = significant positive relationship reported; “-” = significant negative relationship reported; “NS” = non-significant findings reported; SNS = Social Networking Site; CMC = Computer Mediated Communication; MDD = Major Depressive Disorder; NSA = Need for Social Reassurance; CES-D = Center for Epidemiologic Studies Depression Scale; PHQ-9 = Patient Health Questionnaire – 9; WHOQOL-BREF = WHO Quality of Life-BREF; BDI = Beck Depression Inventory; ESM = Experience Sampling Method; T0 = baseline; T1 = Time 1; T2 = Time 2

Frequency of SNS use refers to studies using a Likert type question with no defined time measurement (e.g. never – very frequently).
